# Supplementary material
Source: ML conference proceedings conference paper supplement (https://proceedings.mlr.press/v115/kuzelka20a.html)
Supplement: Supplementary file 1 [file kuzelka20a-supp.pdf]

# Markov Logic Networks for Knowledge Base Completion: A Theoretical Analysis Under the MCAR Assumption (Appendix)

**Ondřej Kuželka**  
Department of CS  
CTU in Prague  
Prague, Czech Republic

**Jesse Davis**  
Department of CS  
KU Leuven  
Leuven, Belgium

## A APPENDIX

### A.1 PROOF OF THEOREM 7

Here we prove Theorem 7. The proof follows the steps of the proof of Theorem 5; there are just some additional details that are arguably not necessary for understanding the main ideas, which is why we deferred it to appendix.

*Proof of Theorem 7.* We first redefine the random variable  $\langle \mathbf{w}, Q(\Phi, \omega) \rangle$  as a function of independent Bernoulli random variables  $B_1, \dots, B_{|\omega^*|}$  satisfying  $P[B_i = 0] = \delta$ , where  $\delta$  is the subsampling rate from Equation 6 (main paper). We suppose that there is some (arbitrary) ordering of the atoms in  $\omega^* = \{a_1, \dots, a_{|\omega^*|}\}$  so that we could uniquely identify each  $B_i$  with an atom  $a_i$  in  $\omega^*$ . Then we define a function  $g : \{0, 1\}^{|\omega^*|} \rightarrow 2^{\omega^*}$  as:  $g(b_1, \dots, b_{|\omega^*|}) \mapsto \{a_i \in \omega^* \mid b_i = 1\}$ . Finally we define  $Q_{\mathbf{w}, \Phi}(b_1, \dots, b_{|\omega^*|}) \triangleq \langle \mathbf{w}, Q(\Phi, g(b_1, \dots, b_{|\omega^*|})) \rangle$ . It is easy to see that  $\langle \mathbf{w}, Q(\Phi, \omega) \rangle$  and  $Q_{\mathbf{w}, \Phi}(B_1, \dots, B_{|\omega^*|})$  have the same distribution. We also assume w.l.o.g. that  $\omega^*$  contains only relations that also appear in  $\Phi$  (since the rest of the relations in  $\omega^*$  do not influence the values  $Q(\Phi, \omega)$ ). We denote by  $\mathcal{R}_\Phi \subseteq \mathcal{R}$  the set of relations present in  $\Phi$ .

From McDiarmid's inequality [1] we have

$$\begin{aligned} P[|Q_{\mathbf{w}, \Phi}(B_1, \dots, B_{|\omega^*|}) - \mathbb{E}[Q_{\mathbf{w}, \Phi}]| \geq \varepsilon] \\ \leq 2 \cdot \exp\left(\frac{-2\varepsilon^2}{\sum_{j=1}^{|\omega^*|} c_j^2}\right) \end{aligned} \quad (1)$$

provided that  $|Q_\alpha(B_1, \dots, B_j, \dots, B_{|\omega^*|}) - Q_\alpha(B_1, \dots, B'_j, \dots, B_{|\omega^*|})| \leq c_j$  holds for every  $j$  and every value of  $B_j$  and  $B'_j$ .

It follows from Lemma 1 that we can set  $c_j := \sum_{k=1}^m \|\mathbf{w}\| \cdot |\alpha_k| \cdot |\Delta|^{-A_j}$ , where  $w_k$  is the  $k$ -th component of the weight vector  $\mathbf{w}$  and  $A_j$  is the arity of the atom  $a_j$ , in (1).

Let us split  $\omega^*$  into disjoint subsets  $\omega_1^*, \omega_2^*, \dots, \omega_M^*$  where each  $\omega_i^*$  contains all atoms from  $\omega^*$  with exactly  $i$  unique constants. Then we can write

$$\begin{aligned} \sum_{j=1}^{|\omega^*|} c_j^2 &= \sum_{i=1}^{|\omega^*|} \left( \|\mathbf{w}\| \cdot \sum_{i=1}^m |\alpha_i| \cdot |\Delta|^{-A_i} \right)^2 \\ &= |\omega_1^*| \cdot \left( \frac{\|\mathbf{w}\| \cdot \sum_{i=1}^m |\alpha_i|}{|\Delta|} \right)^2 \\ &\quad + \dots + |\omega_M^*| \cdot \left( \frac{\|\mathbf{w}\| \cdot \sum_{i=1}^m |\alpha_i|}{|\Delta|^M} \right)^2. \end{aligned} \quad (2)$$

We can also bound every  $|\omega_i^*|$  as  $|\omega_i^*| \leq i^{M-1} \cdot |\mathcal{R}_\alpha| \cdot |\Delta|^i$ . By substituting this into (2) and assuming that  $|\Delta| \geq (M+1)^M$ , we obtain (we omit here the detailed algebraic manipulations which are the same as in the proof of Theorem 5)

$$\begin{aligned} \sum_{j=1}^{|\omega^*|} c_j^2 &\leq |\mathcal{R}_\Phi| \cdot \|\mathbf{w}\|^2 \\ &\quad \cdot \left( \sum_{i=1}^m |\alpha_i| \right)^2 \cdot \left( \frac{1}{|\Delta|} + \frac{2^{M-1}}{|\Delta|} + \dots + \frac{M^{M-1}}{|\Delta|^M} \right) \\ &\leq 2 \cdot \frac{|\mathcal{R}_\Phi| \cdot \|\mathbf{w}\|^2 \cdot \left( \sum_{i=1}^m |\alpha_i| \right)^2}{|\Delta|}. \end{aligned}$$

Finally, plugging this into (1) finishes the proof.  $\square$

## References

- [1] Colin McDiarmid. On the method of bounded differences. *Surveys in combinatorics*, 141(1):148–188, 1989.
